# Supplementary material for: Construction of CoS/Cd0.5Zn0.5S ohmic heterojunctions for improving photocatalytic hydrogen production activity
Source: Royal Society of Chemistry journal article supplement (doi:10.1039/d2nj04665b), 2022-11-21
Supplement: d2nj04665b1.pdf [file d2nj04665b1.pdf]

## Electronic Supplementary Information

### (New Journal of Chemistry)

#### The construction of CoS/Cd<sub>0.5</sub>Zn<sub>0.5</sub>S Ohmic heterojunction for improved photocatalytic hydrogen production activity

Shuhan Jiang<sup>b,†</sup>, Luping Shen<sup>b,†</sup>, Yanan Liu<sup>b</sup>, Shuaikang Qi<sup>b</sup>, Zhufeng Lu<sup>a,\*</sup>, Lei Li<sup>b</sup>, Hongxia Ma<sup>b</sup>, Hongmei Wang<sup>b,\*</sup>

<sup>a</sup> Analysis and testing center, Jiaying University, Jiaying 314001, China

<sup>b</sup> College of Biological, Chemical Sciences and Engineering, Jiaying University, Jiaying 314001, China

†These authors contributed equally to this work.

\*Corresponding authors (E-mail: luzhufeng@zjxu.edu.cn (Lu Z); E-mail: hongmei256 @163.com (Wang H))

**Table S1** ICP-OES characterization of the X%-CoS/Cd<sub>0.5</sub>Zn<sub>0.5</sub>S nanocomposites

| X value | Element | CC (mg·kg <sup>-1</sup> ) | Theoretical                | Experimental               |
|---------|---------|---------------------------|----------------------------|----------------------------|
|         |         |                           | mass ratio<br>(Co:(Cd+Zn)) | mass ratio<br>(Co:(Cd+Zn)) |
| 10%     | Co      | 43680.73                  |                            |                            |
|         | Cd      | 412063.78                 | 6.41 wt%                   | 6.70 wt%                   |
|         | Zn      | 239887.47                 |                            |                            |
| 20%     | Co      | 81045.48                  |                            |                            |
|         | Cd      | 380071.18                 | 13.30 wt%                  | 13.51 wt%                  |
|         | Zn      | 219821.39                 |                            |                            |

|     |    |           |           |           |
|-----|----|-----------|-----------|-----------|
|     | Co | 111309.96 |           |           |
| 30% | Cd | 372148.49 | 19.99 wt% | 18.95 wt% |
|     | Zn | 215239.15 |           |           |
|     | Co | 140067.44 |           |           |
| 40% | Cd | 350481.39 | 26.60 wt% | 25.32 wt% |
|     | Zn | 202707.57 |           |           |
|     | Co | 168091.93 |           |           |
| 50% | Cd | 337871.92 | 33.26 wt% | 31.52 wt% |
|     | Zn | 195414.65 |           |           |

\*X is the molar ratio of CoS and CdZnS in initial synthesis.

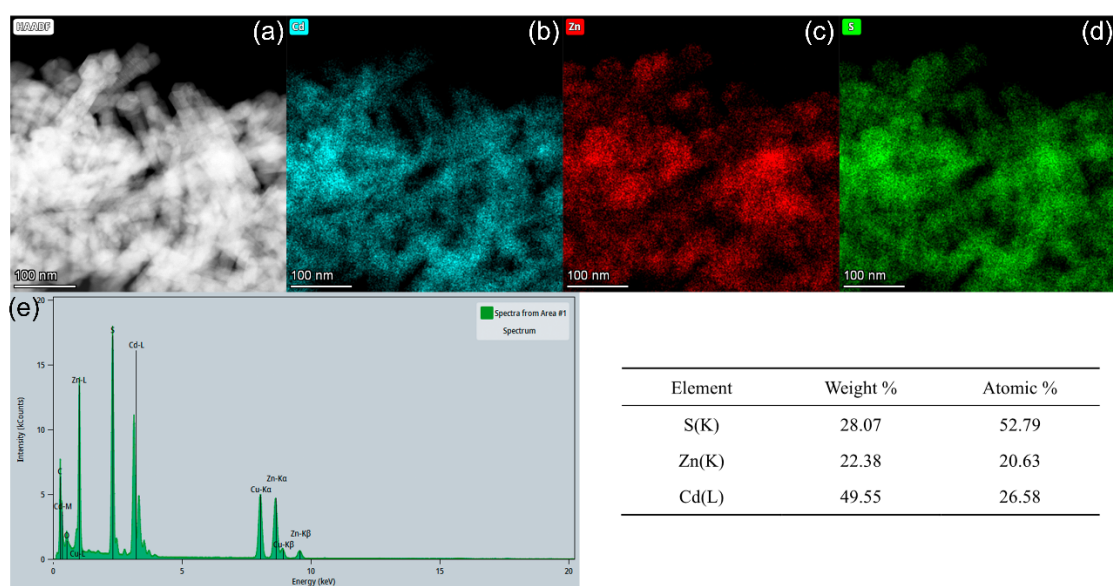

**Fig. S1** High-angle annular dark field (HAADF)-STEM image of  $\text{Cd}_{0.5}\text{Zn}_{0.5}\text{S}$  (a). Elemental mapping of Cd (b), Zn (c) and S (d) for  $\text{Cd}_{0.5}\text{Zn}_{0.5}\text{S}$ . (e) The EDX spectra.

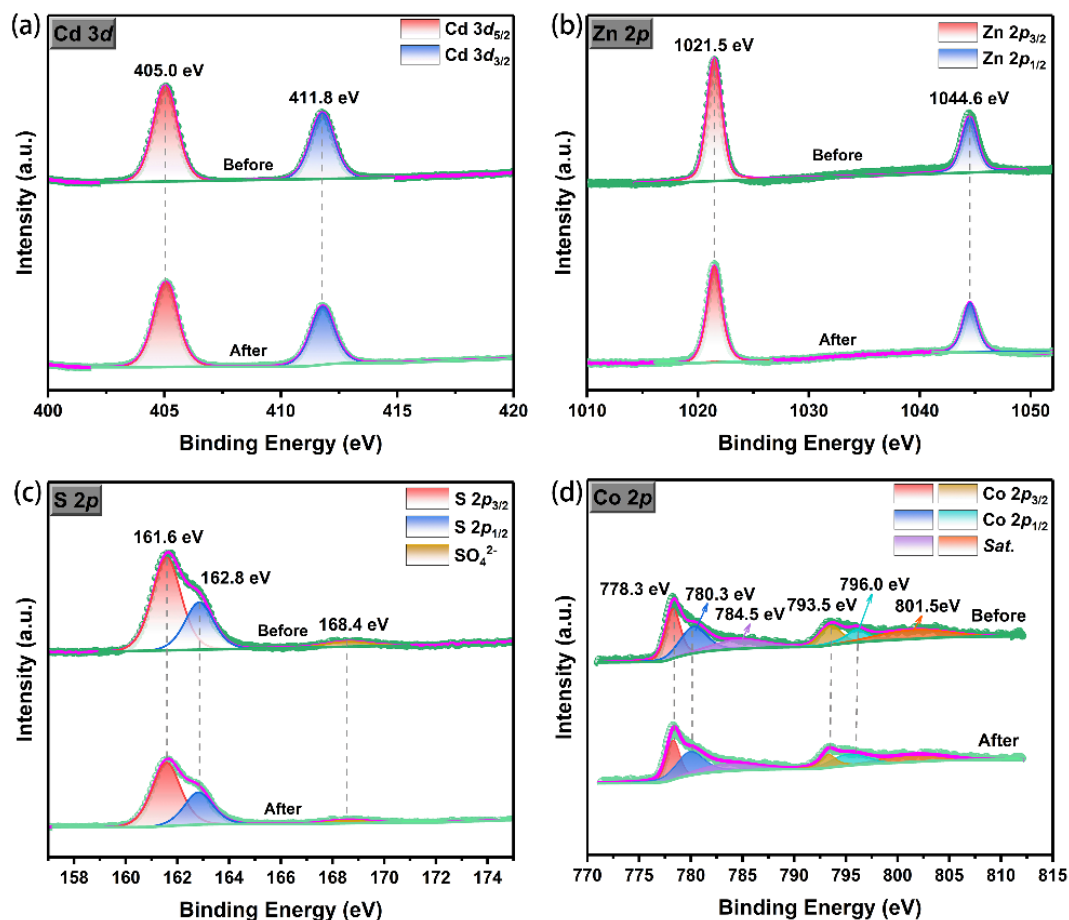

**Fig. S2** XPS results of (a) Cd 3d; (b) Zn 2p; (c) S 2p; (d) Co 2p of 30% CoS/Cd<sub>0.5</sub>Zn<sub>0.5</sub>S nanocomposite before and after cycle photocatalysis.

**Table S2** Comparison of the H<sub>2</sub> revolution rates with other photocatalysts.

| Catalyst                                            | Light source         | Sacrificial reagent                                                    | H <sub>2</sub> yield (mmol·g <sup>-1</sup> ·h <sup>-1</sup> ) | Reaction time (h) | Ref.      |
|-----------------------------------------------------|----------------------|------------------------------------------------------------------------|---------------------------------------------------------------|-------------------|-----------|
| 30%-CoS/Cd <sub>0.5</sub> Zn <sub>0.5</sub> S       | λ>400 nm<br>300 W Xe | 3 vol.% lactic acid                                                    | 6.917                                                         | 3                 | This work |
| 2%-Cu <sub>2</sub> S/CZS                            | LED lamp<br>5 W      | 0.35 M Na <sub>2</sub> S and<br>0.25 M Na <sub>2</sub> SO <sub>3</sub> | 5.904                                                         | 5                 | [1]       |
| In <sub>2</sub> O <sub>3</sub> /CdZnS<br>(FICZ-2.5) | λ>420 nm<br>300 W Xe | 0.35 M Na <sub>2</sub> S and<br>0.25 M Na <sub>2</sub> SO <sub>3</sub> | 1.11                                                          | 5                 | [2]       |
| CNTs (Cu)-1.0 wt.%                                  | λ>420 nm<br>300 W Xe | 0.35 M Na <sub>2</sub> S and<br>0.25 M Na <sub>2</sub> SO <sub>3</sub> | 2.995                                                         | 5                 | [3]       |

|                                                                                      |                              |                                                                                        |       |   |      |
|--------------------------------------------------------------------------------------|------------------------------|----------------------------------------------------------------------------------------|-------|---|------|
| UIO-66(Ce)/Zn                                                                        | 300 W Xe                     | 1.0 M Na <sub>2</sub> S·9H <sub>2</sub> O<br>and 1.0 M Na <sub>2</sub> SO <sub>3</sub> | 3.959 | / | [4]  |
| ZnCdS/NiAl<br>hydrotalcite                                                           | λ>420 nm<br>5 W LED<br>light | 0.35 M Na <sub>2</sub> S and<br>0.25 M Na <sub>2</sub> SO <sub>3</sub>                 | 1.512 | 5 | [5]  |
| ZnCdS QDs<br>(Zn: Cd=3:1)                                                            | λ>420 nm<br>300 W Xe         | 0.75 M Na <sub>2</sub> S and<br>1.05 M Na <sub>2</sub> SO <sub>3</sub>                 | 3.752 | 5 | [6]  |
| ZnCdS/<br>Co@CoO                                                                     | λ>420 nm<br>300 W Xe         | Na <sub>2</sub> S and Na <sub>2</sub> SO <sub>3</sub>                                  | 5.445 | 5 | [7]  |
| CN/ZCS-2/Pt                                                                          | λ>420 nm<br>300 W Xe         | 0.25 M Na <sub>2</sub> S and<br>0.25 M Na <sub>2</sub> SO <sub>3</sub>                 | 3.245 | 3 | [8]  |
| BiVO <sub>4</sub> -ZnCdS                                                             | λ>420 nm<br>300 W Xe         | 0.25 M Na <sub>2</sub> S and<br>0.35 M Na <sub>2</sub> SO <sub>3</sub>                 | 0.152 | 5 | [9]  |
| NiS/rGO/C <sub>0.3</sub> Z <sub>0.7</sub> S                                          | λ>420 nm<br>300 W Xe         | 0.35 M Na <sub>2</sub> S and<br>0.25 M Na <sub>2</sub> SO <sub>3</sub>                 | 1.058 | 4 | [10] |
| CZS:Yb(15)                                                                           | λ>420 nm<br>300 W Xe         | 20 vol.% CH <sub>3</sub> OH                                                            | 0.422 | 5 | [11] |
| Zn <sub>1/2</sub> Cd <sub>1/2</sub> In <sub>2</sub> S <sub>4</sub> /MoS <sub>2</sub> | λ>400 nm<br>300 W Xe         | 0.35 M Na <sub>2</sub> S and<br>0.25 M Na <sub>2</sub> SO <sub>3</sub>                 | 2.255 | 5 | [12] |

\*Xe, xenon lamp.

## Notes and references

- [1] G. Wang, Y. Quan, K. Yang and Z. Jin, *J. Mater. Sci. Technol.*, 2022, **121**, 28-39.
- [2] H. Yang, J. Tang, Y. Luo, X. Zhan, Z. Liang, L. Jiang, H. Hou and W. Yang, *Small*, 2021, **17**(36), 2102307.
- [3] B. Gong, Y. Lu, P. Wu, Z. Huang, Y. Zhu, Z. Dang, N. Zhu, G. Lu and J. Huang, *Appl. Surf. Sci.*, 2016, **365**, 280-290.
- [4] Y. Wang, H. Jin, Y. Li, J. Fang and C. Chen, *Int. J. Hydrogen Energ.*, 2022, **47**(2), 962-970.
- [5] C. Zheng, G. Jiang and Z. Jin, *Int. J. Hydrogen Energ.*, 2022, **47**(1), 292-304.

- [6] S. Qi, Y. Miao, J. Chen, H. Chu, B. Tian, B. Wu, Y. Li and B. Xin, *Nanomaterials*, 2021, **11**(6), 1357.
- [7] Y. Zou, C. Guo, X. Cao, T. Chen, Y. Kou, L. Zhang, T. Wang, N. Akram and J. Wang, *Int. J. Hydrogen Energ.*, 2022, **47**(60), 25289-25299.
- [8] T. Bai, X. Shi, M. Liu, H. Huang, J. Zhang and X.H. Bu, *RSC Adv.*, 2021, **11**(60), 38120-38125.
- [9] M. Imran, A.B. Yousaf, M. Farooq and P. Kasak, *Int. J. Hydrogen Energ.*, 2022, **47**(13), 8327-8337.
- [10] X. Wang, L. Li, H. Gu, H. Zhang, J. Zhang, Q. Zhang and W.L. Dai, *Appl. Surf. Sci.*, 2022, **574**, 151553.
- [11] P. Mu, M. Zhou, K. Yang, C. Zhou, Y. Mi, Z. Yu, K. Lu, Z. Li, S. Ouyang, W. Huang and C. Yu, *Sustain. Energ. Fuels*, 2021, **5**(22), 5814-5824.
- [12] Y. Hao, Z. Min, H. Guo, P. Shi, Y. Min, J. Fan and Q. Xu, *Appl. Surf. Sci.*, 2021, **546**, 149137.
